# Supplementary material for: Alterations of lower respiratory tract microbiome and short-chain fatty acids in different segments in lung cancer: a multiomics analysis
Source: Front Cell Infect Microbiol. 2023 Oct 16;13:1261284. doi: 10.3389/fcimb.2023.1261284 (PMC10617678; doi:10.3389/fcimb.2023.1261284)
Supplement: Supplementary file 1 [file Table_1.xlsx]

## Sheet: Table S1
Table S1. Summary of metagenomic sequencing data
Sample	InsertSize(bp)	SeqStrategy	RawData	CleanData	Clean_Q20	Clean_Q30	Clean_GC(%)	Effective(%)
P1.1	350	(150:150)	6577.67	6569.68	95.71	89.31	41.28	99.879
P1.2	350	(150:150)	6970.57	6961.63	96.78	91.59	41.58	99.872
P2.1	350	(150:150)	6523.78	6519.95	95.66	89.28	41.02	99.941
P2.2	350	(150:150)	6674.52	6669.94	95.78	89.48	41.3	99.931
P3.1	350	(150:150)	6288.4	6280.3	95.58	89.12	41.66	99.871
P3.2	350	(150:150)	6489.54	6443.54	95.36	88.75	41.2	99.291
P4.1	350	(150:150)	6320.97	6302.63	96.06	89.66	41.7	99.71
P4.2	350	(150:150)	8314.7	8308.45	95.95	89.6	41.04	99.925
P5.1	350	(150:150)	6700.58	6692.07	95.66	89.28	42.55	99.873
P5.2	350	(150:150)	8164.39	8153.45	95.72	89.18	41.47	99.866
P6.1	350	(150:150)	7383.34	7372.77	97.16	92.42	41.91	99.857
P6.2	350	(150:150)	8014.04	7992.26	97.06	92.13	40.98	99.728
P7.1	350	(150:150)	7584.67	7574.6	95.9	89.78	41.8	99.867
P7.2	350	(150:150)	6419.62	6414.19	95.45	88.88	41.12	99.915
P8.1	350	(150:150)	6278.22	6268.86	95.86	89.7	41.69	99.851
P8.2	350	(150:150)	6155.87	6149.57	95.58	89.15	41.45	99.898
P9.1	350	(150:150)	6410.36	6400.09	96.97	91.98	41.66	99.84
P9.2	350	(150:150)	6658.8	6649.51	96.84	91.69	41.31	99.86
P10.1	350	(150:150)	6308.63	6299.39	95.45	88.9	41.45	99.854
P10.2	350	(150:150)	6335.74	6327.33	95.97	89.36	41.4	99.867
P11.1	350	(150:150)	6899.73	6868.75	96.37	90.59	56.48	99.551
P11.2	350	(150:150)	6888.21	6856.75	95.86	89.84	57.75	99.543
P12.1	350	(150:150)	6113.95	6103.69	95.63	89.25	41.45	99.832
P12.2	350	(150:150)	6277.54	6256.83	95.6	89.23	41.28	99.67
P13.1	350	(150:150)	6871.05	6860.71	95.69	89.09	42.66	99.85
P13.2	350	(150:150)	6149.79	6140.57	95.59	89.17	41.19	99.85
P14.1	350	(150:150)	8245.34	8227.46	96.91	91.99	42.71	99.783
P14.2	350	(150:150)	6719.66	6699.1	97.09	92.25	41.2	99.694
P15.1	350	(150:150)	6148.08	6131.76	95.86	89.68	41.87	99.735
P15.2	350	(150:150)	6537.25	6514.97	95.53	89.09	41.71	99.659
P16.1	350	(150:150)	8213.04	8202.84	96.94	91.94	41.76	99.876
P16.2	350	(150:150)	7160.51	7143.87	97.18	92.47	41.38	99.768
P17.1	350	(150:150)	7993.42	7982.1	95.45	88.93	41.7	99.858
P17.2	350	(150:150)	6873.89	6863.15	95.48	88.96	41.39	99.844
P18.1	350	(150:150)	6302.25	6290.9	95.25	88.56	41.84	99.82
P18.2	350	(150:150)	7802.94	7786.11	96.93	91.98	42.08	99.784
P19.1	350	(150:150)	7703.41	7680.86	96.78	91.55	41.47	99.707
P19.2	350	(150:150)	7406.3	7391.49	97.2	92.48	41.03	99.8
P21.1	350	(150:150)	6806.08	6784.66	96	90	41.98	99.685
P21.2	350	(150:150)	6736.2	6724.87	96.25	90.02	41.23	99.832
P22.1	350	(150:150)	6915.98	6899.36	95.69	89.37	41.8	99.76
P22.2	350	(150:150)	6047.72	6039.04	95.92	89.4	41.59	99.857
P23.1	350	(150:150)	6056.6	6047.46	96.04	89.98	41.88	99.849
P23.2	350	(150:150)	7944.12	7936.92	96.14	89.81	41.19	99.909
P24.1	350	(150:150)	6254.47	6239.62	95.35	88.73	41.56	99.763
P24.2	350	(150:150)	6332.44	6322.76	96	89.52	41.44	99.847
P25.1	350	(150:150)	6072.56	6067.32	95.79	89.5	41.17	99.914
P25.2	350	(150:150)	6396.62	6388.15	95.59	89.15	41.55	99.868
P26.1	350	(150:150)	6506.15	6496.19	95.2	88.52	43.78	99.847
P26.2	350	(150:150)	6470.19	6463.71	95.91	89.36	41.27	99.9
P27.1	350	(150:150)	6618.75	6610.94	96.78	91.56	41.55	99.882
P27.2	350	(150:150)	6320.32	6303.35	95.56	89.1	42.02	99.731
P28.1	350	(150:150)	6656.45	6639.82	95.56	88.77	41.79	99.75
P28.2	350	(150:150)	8125.22	8111.79	95.92	89.43	41.11	99.835
P29.1	350	(150:150)	6259.61	6253.25	95.77	89.47	41.44	99.898
P29.2	350	(150:150)	6631.84	6624.87	95.81	89.23	41.27	99.895
InsertSize (bp): Insert fragment length (default 350bp library); Raw Data: Offline raw data; CleanData: filtered valid data; Clean_ Q20: Percentage of base numbers with a sequencing error rate less than 0.01 (mass value greater than 20) in CleanData; Clean_ Q30: Percentage of base numbers with sequencing error rate less than 0.001 (mass value greater than 30) in CleanData; Clean_ GC (%): GC conte…

## Sheet: Table S2
Table S2. Data preprocessing of metagenomic sequencing
#Sample	InsertSize(bp)	RawData	CleanData	Clean_Q20	Clean_Q30	Clean_GC(%)	Effective(%)
P1.1	350	6577.67	743.28	95.71	89.31	41.28	0.113001
P1.2	350	6970.57	889.76	96.78	91.59	41.58	0.127645
P2.1	350	6523.78	651.31	95.66	89.28	41.02	0.0998363
P2.2	350	6674.52	802.05	95.78	89.48	41.3	0.120166
P3.1	350	6288.4	615.93	95.58	89.12	41.66	0.097947
P3.2	350	6489.54	617.07	95.36	88.75	41.2	0.0950869
P4.1	350	6320.97	448.5	96.06	89.66	41.7	0.0709543
P4.2	350	8314.7	1442.23	95.95	89.6	41.04	0.173455
P5.1	350	6700.58	828.11	95.66	89.28	42.55	0.123588
P5.2	350	8164.39	1291.92	95.72	89.18	41.47	0.158238
P6.1	350	7383.34	1010.87	97.16	92.42	41.91	0.136912
P6.2	350	8014.04	841.57	97.06	92.13	40.98	0.105012
P7.1	350	7584.67	1012.2	95.9	89.78	41.8	0.133453
P7.2	350	6419.62	647.15	95.45	88.88	41.12	0.100808
P8.1	350	6278.22	605.75	95.86	89.7	41.69	0.0964844
P8.2	350	6155.87	683.4	95.58	89.15	41.45	0.111016
P9.1	350	6410.36	537.89	96.97	91.98	41.66	0.0839095
P9.2	350	6658.8	786.33	96.84	91.69	41.31	0.118089
P10.1	350	6308.63	736.16	95.45	88.9	41.45	0.116691
P10.2	350	6335.74	463.27	95.97	89.36	41.4	0.0731201
P11.1	350	6899.73	1027.26	96.37	90.59	56.48	0.148884
P11.2	350	6888.21	1015.74	95.86	89.84	57.75	0.147461
P12.1	350	6113.95	741.48	95.63	89.25	41.45	0.121277
P12.2	350	6277.54	705.07	95.6	89.23	41.28	0.112316
P13.1	350	6871.05	998.58	95.69	89.09	42.66	0.145331
P13.2	350	6149.79	677.32	95.59	89.17	41.19	0.110137
P14.1	350	8245.34	1272.87	96.91	91.99	42.71	0.154374
P14.2	350	6719.66	847.19	97.09	92.25	41.2	0.126076
P15.1	350	6148.08	775.61	95.86	89.68	41.87	0.126155
P15.2	350	6537.25	664.78	95.53	89.09	41.71	0.101691
P16.1	350	8213.04	1340.57	96.94	91.94	41.76	0.163225
P16.2	350	7160.51	1288.04	97.18	92.47	41.38	0.179881
P17.1	350	7993.42	920.95	95.45	88.93	41.7	0.115214
P17.2	350	6873.89	801.42	95.48	88.96	41.39	0.116589
P18.1	350	6302.25	429.78	95.25	88.56	41.84	0.0681947
P18.2	350	7802.94	930.47	96.93	91.98	42.08	0.119246
P19.1	350	7703.41	930.94	96.78	91.55	41.47	0.120848
P19.2	350	7406.3	933.83	97.2	92.48	41.03	0.126086
P21.1	350	6806.08	933.61	96	90	41.98	0.137173
P21.2	350	6736.2	863.73	96.25	90.02	41.23	0.128222
P22.1	350	6915.98	843.51	95.69	89.37	41.8	0.121965
P22.2	350	6047.72	575.25	95.92	89.4	41.59	0.0951185
P23.1	350	6056.6	684.13	96.04	89.98	41.88	0.112956
P23.2	350	7944.12	971.65	96.14	89.81	41.19	0.122311
P24.1	350	6254.47	682	95.35	88.73	41.56	0.109042
P24.2	350	6332.44	659.97	96	89.52	41.44	0.10422
P25.1	350	6072.56	500.09	95.79	89.5	41.17	0.0823524
P25.2	350	6396.62	524.15	95.59	89.15	41.55	0.0819417
P26.1	350	6506.15	633.68	95.2	88.52	43.78	0.0973971
P26.2	350	6470.19	597.72	95.91	89.36	41.27	0.0923806
P27.1	350	6618.75	746.28	96.78	91.56	41.55	0.112752
P27.2	350	6320.32	547.85	95.56	89.1	42.02	0.0866807
P28.1	350	6656.45	783.98	95.56	88.77	41.79	0.117777
P28.2	350	8125.22	1052.75	95.92	89.43	41.11	0.129566
P29.1	350	6259.61	687.14	95.77	89.47	41.44	0.109774
P29.2	350	6631.84	985.46	95.81	89.23	41.27	0.148595
Perform data statistics on each part of the sequencing results (in millions of bases); Sample ID represents the name of the sample; Raw Data represents the raw data of the offline machine (Raw Data); Low_ Quality represents low-quality base data; N-num represents data containing N bases; Adapter represents adapter data; Clean Data represents the filtered valid data (Clean Data); Q20 and Q30 repre…

## Sheet: Table S3
Table S3. Scaftigs after metagenomic assembles (>=500bp)
SampleID	Total len.(bp)	Num.	Average len.(bp)	N50 Len.(bp)	N90 Len.(bp)	Max len.(bp)
P1.1	458732800	647294	708.69	690	528	18508
P1.2	718843343	943418	761.96	753	539	15955
P2.1	442035379	626016	706.11	686	528	11382
P2.2	465903710	656860	709.29	690	528	15876
P3.1	349653642	505814	691.27	668	525	14531
P3.2	390392726	556314	701.75	680	526	12126
P4.1	379643544	547436	693.49	672	526	11852
P4.2	732986345	970576	755.21	745	538	14176
P5.1	448093507	627353	714.26	695	529	11886
P5.2	644006333	873308	737.43	724	534	17138
P6.1	661218521	881886	749.78	737	536	19268
P6.2	820565428	1039401	789.46	784	543	19946
P7.1	609600544	827526	736.65	722	533	13854
P7.2	395454045	566336	698.27	677	526	20866
P8.1	383835370	553757	693.15	672	526	12361
P8.2	379260588	547337	692.92	671	526	16538
P9.1	507003073	704328	719.84	702	531	16652
P9.2	655748468	877236	747.52	735	536	19976
P10.1	401164499	574537	698.24	678	526	12616
P10.2	377516314	544473	693.36	672	526	9846
P11.1	5517506	8658	637.27	594	513	5703
P11.2	14051092	10823	1298.26	1459	546	156745
P12.1	346843507	501514	691.59	668	525	17277
P12.2	337943646	490337	689.21	666	524	12249
P13.1	513792491	680518	755	735	534	13205
P13.2	344443427	493174	698.42	676	526	12519
P14.1	519631481	712452	729.36	710	532	16518
P14.2	546688523	750864	728.08	711	532	16409
P15.1	382036652	546612	698.92	677	526	53860
P15.2	381062764	547823	695.59	672	526	61983
P16.1	818197606	1052035	777.73	772	542	13277
P16.2	589360668	787967	747.95	730	535	31044
P17.1	639145425	858338	744.63	730	535	19847
P17.2	422337815	599988	703.91	683	527	18585
P18.1	367169108	531092	691.35	669	525	11010
P18.2	762450980	989476	770.56	763	540	16004
P19.1	722777039	953821	757.77	748	538	19604
P19.2	695299485	924064	752.44	742	537	16214
P21.1	403914177	578506	698.2	677	527	10579
P21.2	428057077	609081	702.79	683	527	11075
P22.1	449375932	637251	705.18	685	528	11713
P22.2	351903420	509860	690.2	667	525	13091
P23.1	362706130	523861	692.37	671	525	13607
P23.2	648529353	861757	752.57	738	536	11894
P24.1	364430730	528674	689.33	667	525	10544
P24.2	393443621	563757	697.9	677	527	16333
P25.1	368775489	526115	700.94	679	526	17645
P25.2	428038766	608459	703.48	683	527	9851
P26.1	407082901	552824	736.37	714	531	13686
P26.2	460480609	647487	711.18	692	529	13553
P27.1	570001999	778601	732.08	716	533	14625
P27.2	396619958	552551	717.8	694	528	19642
P28.1	470909368	659836	713.68	695	529	11978
P28.2	603587205	824422	732.13	718	533	14742
P29.1	367770714	530434	693.34	671	525	26541
P29.2	476490052	669823	711.37	692	529	12799
Total Len (bp): represents the total length of the assembled Scaffolds； Num.: represents the total number of Scaffolds assembled； Average Len (bp): represents the average length of Scaftigs； N50 Len (bp) and N90 Len (bp): Refers to sorting Scaftigs by length, and then adding them from long to short. When the sum value reaches 50% and 90% of the total length of Scaftigs, the length value of Scafti…

## Sheet: Table S4
Table S4. Taxonomic information of differentiated species among subgroups.
Speciesa	Genus	Family	Order	Class	Phylumb	Kingdom
Mortierella elongata	Linnemannia	Mortierellaceae	Mortierellales	Mortierellomycetes	Mucoromycota	Fungi
Debaryomyces fabryi	Debaryomyces	Debaryomycetaceae	Saccharomycetales	Saccharomycetes	Ascomycota	Fungi
Tetrapisispora blattae	Tetrapisispora	Saccharomycetaceae	Saccharomycetales	Saccharomycetes	Ascomycota	Fungi
Schizosaccharomyces japonicus	Schizosaccharomyces	Schizosaccharomycetaceae	Schizosaccharomycetales	Schizosaccharomycetes	Ascomycota	Fungi
Cordyceps militaris	Cordyceps	Cordycipitaceae	Hypocreales	Sordariomycetes	Ascomycota	Fungi
Acinetobacter baumannii	Acinetobacter	Moraxellaceae	Moraxellales	Gammaproteobacteria	Pseudomonadota	Bacteria
Actinotignum urinale	Actinotignum	Actinomycetaceae	Actinomycetales	Actinomycetes	Actinomycetota	Bacteria
Bacillus cereus	Bacillus	Bacillaceae	Bacillales	Bacilli	Bacillota	Bacteria
Bacillus sp. EAC	Bacillus	Bacillaceae	Bacillales	Bacilli	Bacillota	Bacteria
Bacillus wiedmannii	Bacillus	Bacillaceae	Bacillales	Bacilli	Bacillota	Bacteria
Brachyspira hyodysenteriae	Brachyspira	Brachyspiraceae	Brachyspirales	Spirochaetia	Spirochaetota	Bacteria
Butyrivibrio sp. MC2021	Butyrivibrio	Lachnospiraceae	Eubacteriales	Clostridia	Bacillota	Bacteria
Campylobacter jejuni	Campylobacter	Campylobacteraceae	Campylobacterales	Epsilonproteobacteria	Campylobacterota	Bacteria
Enterobacter cloacae	Enterobacter	Enterobacteriaceae	Enterobacterales	Gammaproteobacteria	Pseudomonadota	Bacteria
Fusobacterium necrophorum	Fusobacterium	Fusobacteriaceae	Fusobacteriales	Fusobacteriia	Fusobacteriota	Bacteria
Haliangium ochraceum	Haliangium	Kofleriaceae	Haliangiales	Polyangia	Myxococcota	Bacteria
Klebsiella aerogenes	Klebsiella	Enterobacteriaceae	Enterobacterales	Gammaproteobacteria	Pseudomonadota	Bacteria
Mycobacterium sp.1100029.7c	Mycobacterium	Mycobacteriaceae	Mycobacteriales	Actinomycetes	Actinomycetota	Bacteria
Neisseria polysaccharea	Neisseria	Neisseriaceae	Neisseriales	Betaproteobacteria	Pseudomonadota	Bacteria
Paenibacillus odorifer	Paenibacillu	Paenibacillaceae	Bacillales	Bacilli	Bacillota	Bacteria
Pseudomonas brenner	Pseudomonas	Pseudomonadaceae	Pseudomonadales	Gammaproteobacteria	Pseudomonadota	Bacteria
Pseudomonas rhodesiae	Pseudomonas	Pseudomonadaceae	Pseudomonadales	Gammaproteobacteria	Pseudomonadota	Bacteria
Pseudomonas sp. NBRC 111137	Pseudomonas	Pseudomonadaceae	Pseudomonadales	Gammaproteobacteria	Pseudomonadota	Bacteria
Tumebacillus flagellatus	Tumebacillus	Alicyclobacillaceae	Bacillales	Bacilli	Bacillota	Bacteria
Betaproteobacteria bacterium RIFCSPLOWO2_12_FULL_62_58	-	-	-	Betaproteobacteria	Pseudomonadota	Bacteria
aTaxonomic species names have been effectively published but not validly published under the rules of the International Code of Nomenclature of Bacteria (Bacteriological Code). bPhylums are renominated by International Committee on Systematics of Prokaryotes (ICSP) on International Code of Nomenclature of Prokaryotes (2021). cDetermination of the DNA genome sequence of this strain has been or is …

## Sheet: Table S5
Table S5. Clinical trials of microbiota in lung cancer
Clinical trial identifier	Titlea	Locationb	Status	Estimated Enrollment	Study type	Phase	Outcomes Measurements	Posted Datec
NCT03068663	Characterization of Microbiota (Intestinal, From Lungs, and Upper Airways) in Patients With Non-small Cell Lung Carcinoma: Exploratory Study	Fecal Lungs URT	Recruiting	40	Interventional	NA	•Difference in diversity of the lungs and upper airways microbiota •Effect of chemotherapy on microbiota, by comparing before and after chemotherapy •Inflammatory status •Effect of microbiota on pulmunary immune cells	2017-03-03
NCT04063501	Longitudinal Evaluation of Microbial and Host Signatures During Immunotherapy for Lung Cancer	LRT URT	Recruiting	80	Observational	-	•PFS •Microbiota signatures in lower and upper airways •Microbiota signatures in stool	2019-08-21
NCT03985735	Characterisation of Gut Microbiota, Bispectral Index Data and Plasma Kynurenine in Patients Undergoing Video-assisted Thoracic Surgery	Lung Fecal	Completed	20	Observational	-	•lung and gut microbiota •Bispectral index data •Plasma kynurenine concentrations	2019-06-14
NCT04698161	Establishment of the Human Intestinal and Salivary Microbiota Biobank - Oncologic Diseases	Faeces Saliva	Completed	50	Observational	-	•Biological samples collection for establishment of the first National Microbiome Biobank	2021-01-06
NCT03688347	Microbiome in Lung Cancer and Other Malignancies	Fecal Skin Nasal Oral	Completed	44	Observational	-	•Identify and compare bacteria within given samples through standard protocol and 16S rRNA amplicon •Correlate data from samples with patient clinical information •Number of TRAEs as defined by NCI-CTCAE Version 4.0	28-Sep-18
NCT04804137	Immune Response Under immunotherapy in Metastatic Non-Small Cell Lung Cancer: Sputum, Blood Samples and Microbiota Study	Sputum Saliva Fecal	Active, not recruiting	24	Observational	-	•Immune and inflammatory response in the blood and airways •Analysis of gut and lung microbiota •Perform blood and sputum pembrolizumab assays.	2021-03-18
NCT05027165	Prospective Evaluation of Immunological, Molecular-genetic, Image-based and Microbial Analyzes to Characterize Tumor Response and Control in Patients With Inoperable Stage III NSCLC Treated With Chemoradiotherapy Followed by Consolidation Therapy With Durvalumab	Fecal Saliva	Active, not recruiting	40	Observational	-	•Predictive biomarker for PFS at 12 and 24 months •Predictive biomarkers for PFS, OS, ORR •Predictive biomarkers forlocal and distant tumor control	2021-08-30
NCT01862809	Cigarette Smoking and Oral Microbiota	Oral	Completed	50	Observational	-	•This is a pilot study to demonstrate the effects of smoking on oralmicrobiotas across differenct oral cavity sites	24-May-13
NCT04924374	Microbiota Transplant in Advanced Lung Cancer Treated With Immunotherapy	Fecal	Recruiting	20	Interventional	NA	•Measure of safety •Measure of Efficacy	2021-06-14
NCT05502913	Fecal Microbiota Transplantation to Improve Efficacy of Immune Checkpoint Inhibitors in Metastatic Lung Cancer	Fecal	Not yet recruiting	80	Interventional	Phase 2	•PFS, OS and ORR •Rate of Disease Control •Microbiome analysis •Serum antibody levels and lymphocyte subpopulation distribution •Safety and feasibility	2022-08-16
NCT05771207	Effects of Soy Protein and Whey Protein on Muscle, Gut Microbiota and Clinical Outcome in Patients With Lung Cancer-related Sarcopenia（LCRS）: a Randomized, Double-blind, Controlled Clinical Study	Fecal	Not yet recruiting	90	Interventional	NA	•Change from Baseline Appendicular skeletal muscle mass index at 3 months •Change from Baseline Hand grip, physical performance, physical function, quality of the life questionaire and gut microbiota composition at 3 months •Number of patients with good Chemotherapy Tolerance •Incidence of Chemotherapy toxicity	2023-03-16
NCT04965129	Effect of Supplementation of Poly-unsaturated n-3 Fatty Acids and High-protein Diet on Epigenetic Modulation of Muscle Mass, Dose-limiting Toxicity and Intestinal Microbiota in Patients With Lung Cancer Submitted to Treatment With Immunotherapy, Chemotherapy and Tyrosine Kinase Inhibitors.	Fecal	Recruiting	50	Interventional	NA	•Change/maintenance in overall skeletal muscle density •Change in muscle mass •Red blood cell omega-3 fatty acid concentrations (eicosapentaenoic [EPA] and docosahexaenoic acid [DHA] ) •Muscle strenght •Change in fecal microbiome composition •Change in levels of miRNA 133	2021-07-16
NCT04682327	Observational Study on the Relationship Between Gut Microbiota and Immunotherapy Response of Non-small Cell Lung Cancer	Fecal	Recruiting	50	Observational	-	•Diversity and Composition of gut microbiota •Concentration of peripheral blood mononuclear cells •Concentration of tumor immune related cytokines •Incidence of anti-PD-1/PD-L1 related adverse events	2022-12-23
NCT03454685	The Role of Microbiota on the Development of Lung Cancer	-	Unknown	100	Observational	-	•Relationship Between Human Microbiota and Epidemiology of Lung Cancer	2018-03-06
NCT05008861	Safety of Gut Microbiota Reconstruction Plus PD-1/PD-L1 Monoclonal Antibodies to Treat Locally Advanced or Metastatic Non-Small Cell Lung Cancer	Fecal	Not yet recruiting	20	Interventional	Phase 1	•Incidence of FMT-related Adverse Events •Incidence of anti-PD-1/PD-L1- related Adverse Events •Changes in diversity and composition of gut microbiota •Efficiency of FMT engraftment •Changes in concentration of peripheral blood mononuclear cells and tumor immune related cytokines •ORR	2021-08-17
NCT05477979	The Effect of Chronic Stress on Efficacy of Immune Checkpoint Inhibitors in Patients With Newly Diagnosed Stage Ⅲ-Ⅳ Lung Cancer	Fecal	Recruiting	300	Observational	-	•ORR, PFS and OS •Effect of Chronic stress on efficacy and quality of ICIs	2022-07-28
NCT04333004	Analysis of Gut Microbiota in Patients With Brain Metastasis of Non-small Cell Lung Cancer Treated by Pembrolizumab Combined With Chemotherapy	Fecal	Unknown status	40	Interventional	Phase 1 Phase 2	•Diversity of gut microbiota	2020-04-04
NCT02559349	Gut Microbiota And Radiotherapy	Fecal	Completed	10	Observational	-	•Number of subject providing stool samples	24-Sep-15
NCT02771470	Intestinal Microflora in Lung Cancer After Chemotherapy	Fecal	Completed	41	Interventional	Phase 1	•Composition of Microorganisms in stool after probiotic intervention •Frequency and severity of Adverse effects during Chemotherapy •The change of immunity and nutrition index	2016-05-13
NCT04189679	Identification of a Predictive Metabolic Signature of Response to Immune Checkpoint Inhibitors in Non-Small Cell Lung Carcinoma	Fecal	Active, not recruiting	60	Observational	-	•Identification of the change from baseline Metabolic signature as predictive factor of the ICI response at 6 months or at the tumoral progression •Identification of the link between the Meta-genomic and immune signatures and the metabolic signature/ICI response at 6 months or at the tumoral progression •Description of the profile change of Meta-genomic signature and immune signature at 2 months …	2019-12-06
NCT05669846	Responder-derived FMT (R-FMT) and Pembrolizumab in Relapsed/ Refractory PD-L1 Positive NSCLC	Fecal	Not yet recruiting	26	Interventional	Phase 2	•Per RECIST v1.1 •Incidence of Adverse Events Related to Treatment •ORR per iRECIST •CD8+ TIL and intra-tumoral myeloid cell density •6-month and 1-/2-year PFS and 1-/2-year OS	2023-01-03
NCT02967497	Clinical Study of YQ1 Plus Cisplatin-based Chemotherapy in Advanced NSCLC EGFR Wild Type	Fecal	Unknown status	56	Interventional	Phase 2	•PFS	2016-11-18
NCT03976804	Epidemiological Study to Assess the Prevalence of Lung Cancer	Faecal	Active, not recruiting	500	Interventional	NA	•Prevalence of lung cancer	2019-06-06
NCT04009122	Evaluation of the Quality of Life of Patients With Metastatic Non-small Cell Lung Cancer With Supplementary Therapy With IGEN-0206	Faecal	Completed	266	Interventional	NA	•Impact of IGEN-0206 on quality of life in patients with metastatic lung cancer according to the EORTC QLQ-C30. •Impact of IGEN-0206 on quality of life in patients with metastatic lung cancer according to the EORTC QLQ-L13 •BMI •Changes in the microbiota •Interleukin levels •Cytokines levels	2019-07-05
NCT05649046	Structuring of a Lung Cancer Screening Program Including Clinical, Radiological and Biological Phenotyping Useful for the Development of Individualized Risk Prediction Tools: PREVALUNG ETOILE	Fecal	Recruiting	160	Interventional	NA	•Number of complete phenotyping clinical, radiological and biological samples •Number of lung cancers diagnosed/Number of patients included •Number of stage IIB lung cancers/number of lung cancers diagnosed •Number of patients in partial smoking cessation/number of active smoking patients included •Satisfaction assessment •Assessment of anxiety •Number of initial positive scans/number of initial …	2022-12-13
NCT05055999	Tumor Microenvironment Surveillance on Simultaneous Liver Metastases Extensive Stage Small Cell Lung Cancer	Fecal	Completed	60	Observational	-	•PFS •OS	2021-09-24
NCT05055908	Severe Adverse Events Biomarkers Investigation on Extensive Stage Small Cell Lung Cancer	Fecal	Completed	60	Observational	-	•PFS •OS	2021-09-24
NCT03659578	Study of Thymosin #1 to Reduce Acute Pneumonia For Bulky Non-small Cell Lung Cancer	Fecal	Completed	69	Interventional	Phase 2	•Incidence of #grade 2 radiation pneumonitis (CTCAE 5.0 version) •Total lymphocyte count •C-reaction protein •grade of pulmonary fibrosis (CTCAE 5.0 version)	2018-09-06
NCT05354102	A First-in-human (FIH) Combination Treatment Study With a Single Dose Level of BMC128	Fecal	Recruiting	12	Interventional	Phase 1	•Number and severity of drug related TEAEs	2022-04-29
NCT03819296	Role of Gut Microbiome and Fecal Transplant on Medication-Induced GI Complications in Patients With Cancer	Fecal	Recruiting	800	Interventional	Phase 1 Phase 2	•Difference in stool microbiome pattern •Incidence of AEs of FMT •Immune profile factors associated with onset of ICPI-related colitis in blood and colon tissue •Genetic factors associated with onset of ICPI-related colitis in blood and colon tissue •Endoscopic and histologic features of ICPI-related colitis before and after medical treatment •Changes of ICPI-related symptoms and QoL •Cytokine fe…	2019-01-28
NCT05037825	The Gut Microbiome and Immune Checkpoint Inhibitor Therapy in Solid Tumors	Fecal	Recruiting	800	Observational	-	•Change in microbiome composition from baseline to after Cycle 2 of checkpoint therapy (6-8 weeks) by analyzing longitudinally-collected stool specimens of 800 patients with primary NSCLC, MM, RCC, and TNBC •Microbiome/Blood samples correlation •Microbiome correlation to blood biomarkers	2021-09-08
NCT04909034	Safety and Potential Efficacy of MS-20 In Combination With Pembrolizumab for the Treatment of NSCLC	Fecal	Recruiting	30	Interventional	Phase 2	•The incidence of TEAE •ORR, PFS, DCRand DOR	2021-06-01
NCT05286294	Microbiota Transplant to Cancer Patients Who Have Failed Immunotherapy Using Faeces From Clinical Responders	Fecal	Recruiting	20	Interventional	Phase 2	•Safety evaluation of FMT in advanced cancer patients •Tumor response evaluation •Feasibility evaluation of FMT for advanced cancer patients •OS, ORR, PFS, DRR, CBR and DOR •Implant engraftment estimation, and the effect of repeated FMT	2022-03-18
NCT04291755	Development and Analysis of a Stool Bank for Cancer Patients	Fecal	Unknown status	100	Observational	-	•Checkpoint inhibitor response	02Mar-20
NCT04038619	Fecal Microbiota Transplantation in Treating Immune-Checkpoint Inhibitor Induced-Diarrhea or Colitis in Genitourinary Cancer Patients	Fecal	Recruiting	40	Interventional	Phase 1	•Incidence of FMT-related adverse events •Clinical response/remission of immune-related diarrhea/colitis •Recurrent immune-related diarrhea/colitis within 3 months post-FMT after initially achieving clinical remission/response	2019-07-31
NCT05638269	A Multicentre Study on Features of the Gut Microbiota of Patients With Critical Chronic Diseases in China	Fecal	Recruiting	12000	Observational	-	•Microbiome •Biochemistry •Metabonomics •Proteomics	2022-12-06
NCT05777603	Study of Aerosolized Antibiotics and Pembrolizumab in Advanced Non-small Cell Lung Cancer	-	Not yet recruiting	20	Interventional	Phase 1	•DLTs - type and grade •Fraction of participants who received adequate doses of all agents at each dose level	21-Mar-23
NCT04105270	RMT in Combination With Durvalumab plus Chemo in Untreated Adenocarcinoma NSCLC. A Randomized Double Blind Phase II Trial	-	Recruiting	82	Interventional	Phase 2	•Number of patients experiencing PFS •Safety and tolerability of RMT •ORR, DOR and OS •imAE •Health-related QoL	2019-09-26
NCT05055947	Efficacy Biomarker Investigation on Extensive Stage Small Cell Lung Cancer	-	Completed	60	Observational	-	•PFS •OS	2021-09-24
NCT04944030	Prediction in Silico of Therapeutic Response in a Prospective Cohort Study of Metastatic Lung Cancer Patients	-	Active, not recruiting	200	Interventional	NA	•OS •To describe response to treatment for each therapeutic sequence •To evaluate PFS for each therapeutic sequence	2021-06-29
NSCLC: non-small cell lung cancer; PFS: progression-free survival; OS: overall survival; ORR: objective response rate; DOR: duration of overall response; DCR: disease control rate; QoL: quality of life; DLTs: dose limiting toxicities; imAEs: Immune mediated adverse events; FMT: fecal microbiota transplantation; TEAEs: treatment-emergent adverse events; CBR: clinical benefit range; CTCAE: national…
